# Supplementary material
Source: publisher site journal article supplement (https://www.spandidos-publications.com/473/downloadSupplementary)

Figure S1. Effects of ATO on NB4 acute promyelocytic leukemia cells. (A) Analysis of the apoptotic rate of CON and ATO-treated NB4 cells by flow cytometry; cells were treated for 24 h. (B) Analysis of differentially expressed proteins using a comparative proteomics approach of CON and ATO-treated NB4 cell groups; cells were treated for 24 h. The circles indicate one of the differentially expressed proteins and its enlarged view; the protein was identified as template-activating factor-I $\beta$  in a follow-up study. ATO, arsenic trioxide; CON, untreated cells.

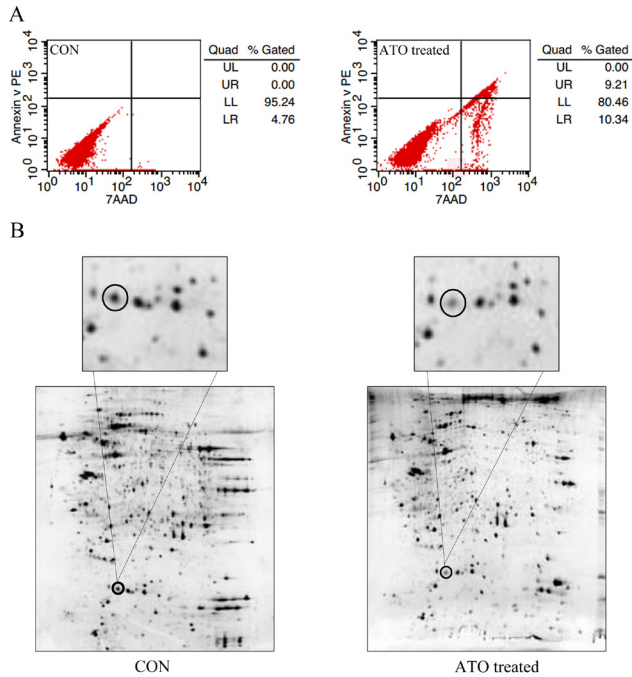

Supplement: Supplementary file 1 [file downloadSupplementary]
